# Supplementary material for: Epigenetic Regulation of Mitochondrial Quality Control Genes in Multiple Myeloma: A Sequenom MassARRAY Pilot Investigation on HMCLs
Source: PubMed Central journal article supplement (PMC8004002; doi:10.3390/jcm10061295), 2021-03-21
Supplement: jcm-10-01295-s001.pdf [file jcm-10-01295-s001.pdf]

**Supplementary Table 1:** Association analysis between methylation levels of CpG sites falling within genes involved in mitochondrial quality control observed in HMCLs (MM1S and KMS11) with respect to healthy control subjects (PBMCs). FDR: False Discovery Rate

| CpG unit              | KMS11 <i>vs</i> normal control cells |          |          | MM1S <i>vs</i> normal control cells |          |          |
|-----------------------|--------------------------------------|----------|----------|-------------------------------------|----------|----------|
|                       | F-statistic                          | P-value  | FDR      | F-statistic                         | P-value  | FDR      |
| COX10_CpG_1           | 0.00                                 | 1.000    | 1.000    | 0.86                                | 0.372    | 0.530    |
| COX10_CpG_2.3         | 0.15                                 | 0.710    | 0.764    | 1.79                                | 0.205    | 0.343    |
| COX10_CpG_4           | 7.26                                 | 0.020    | 0.039    | 2.07                                | 0.176    | 0.309    |
| COX10_CpG_6           | 3.03                                 | 0.108    | 0.173    | 0.43                                | 0.524    | 0.671    |
| COX10_CpG_7.8         | 3.84                                 | 0.074    | 0.124    | 3.52                                | 0.085    | 0.174    |
| COX10_CpG_10.11       | 0.94                                 | 0.350    | 0.432    | 1.15                                | 0.304    | 0.466    |
| COX10_CpG_12          | 1.59                                 | 0.236    | 0.324    | 0.04                                | 0.848    | 0.903    |
| COX10_CpG_13          | 6.96                                 | 0.022    | 0.042    | 7.48                                | 0.018    | 0.049    |
| COX18_CpG_1           | 0.77                                 | 0.398    | 0.480    | 0.34                                | 0.569    | 0.710    |
| COX18_CpG_2           | 2.24                                 | 0.161    | 0.240    | 5.98                                | 0.031    | 0.077    |
| COX18_CpG_4.5.6       | 30.82                                | 1.26E-04 | 4.42E-04 | 12.60                               | 0.004    | 0.013    |
| COX18_CpG_7.8         | 4.55                                 | 0.056    | 0.099    | 2.37                                | 0.152    | 0.283    |
| COX18_CpG_9           | 15.34                                | 0.002    | 0.006    | 21.23                               | 6.03E-04 | 0.003    |
| COX18_CpG_10          | 3.95                                 | 0.070    | 0.118    | 1.84                                | 0.200    | 0.340    |
| COX18_CpG_13.14       | 0.74                                 | 0.406    | 0.482    | 2.23                                | 0.161    | 0.290    |
| COX18_CpG_15          | 24.29                                | 3.49E-04 | 0.001    | 15.72                               | 0.002    | 0.007    |
| COX18_CpG_16.17       | 9.93                                 | 0.008    | 0.019    | 5.50                                | 0.037    | 0.090    |
| COX18_CpG_22.23       | 0.74                                 | 0.406    | 0.482    | 4.37                                | 0.059    | 0.132    |
| COX18_CpG_24          | 1.55                                 | 0.237    | 0.324    | 0.34                                | 0.569    | 0.710    |
| DNM1L_CpG_1.2         | 0.33                                 | 0.578    | 0.637    | 0.28                                | 0.605    | 0.728    |
| DNM1L_CpG_3.4         | 8.46                                 | 0.016    | 0.032    | 43.50                               | 6.11E-05 | 3.41E-04 |
| DNM1L_CpG_5           | 19.20                                | 0.022    | 0.043    | 4.80                                | 0.116    | 0.226    |
| DNM1L_CpG_7.8         | 0.35                                 | 0.568    | 0.630    | 4.17                                | 0.068    | 0.149    |
| DNM1L_CpG_9           | 1.60                                 | 0.295    | 0.389    | 16.20                               | 0.028    | 0.070    |
| DNM1L_CpG_10.11.12.13 | 0.01                                 | 0.940    | 0.959    | 0.42                                | 0.529    | 0.672    |
| DNM1L_CpG_14.15.16    | 0.14                                 | 0.711    | 0.764    | 10.52                               | 0.007    | 0.022    |
| DNM1L_CpG_17.18.19    | 0.84                                 | 0.378    | 0.459    | 1.44                                | 0.253    | 0.407    |
| DNM1L_CpG_20          | 2.24                                 | 0.161    | 0.240    | 11.69                               | 0.005    | 0.016    |
| DNM1L_CpG_28.29.30    | 1.45                                 | 0.252    | 0.340    | 0.77                                | 0.398    | 0.562    |
| DNM1L_CpG_34          | 2.92                                 | 0.116    | 0.182    | 14.62                               | 0.003    | 0.010    |
| DNM1L_CpG_35          | 0.83                                 | 0.380    | 0.461    | 0.98                                | 0.342    | 0.505    |
| FIS1_CpG_1.2          | 4.48                                 | 0.056    | 0.098    | 6.12                                | 0.029    | 0.074    |
| FIS1_CpG_4            | 0.67                                 | 0.430    | 0.507    | 0.08                                | 0.783    | 0.864    |
| FIS1_CpG_5            | 0.67                                 | 0.430    | 0.507    | 0.08                                | 0.783    | 0.864    |
| FIS1_CpG_6.7          | 0.82                                 | 0.384    | 0.463    | 0.30                                | 0.593    | 0.723    |
| KIF5B_CpG_1.2         | 1.41                                 | 0.300    | 0.392    | 1.90                                | 0.240    | 0.391    |
| KIF5B_CpG_3           | 2.99                                 | 0.109    | 0.174    | 0.32                                | 0.582    | 0.717    |
| KIF5B_CpG_11          | 3.40                                 | 0.090    | 0.147    | 4.41                                | 0.057    | 0.130    |
| KIF5B_CpG_12.13.14    | 0.09                                 | 0.769    | 0.813    | 0.59                                | 0.457    | 0.623    |

|                            |          |          |          |          |          |          |
|----------------------------|----------|----------|----------|----------|----------|----------|
| KIF5B_CpG_15.16            | 4.19     | 0.097    | 0.214    | 4.34     | 0.061    | 0.136    |
| KIF5B_CpG_17               | 1.71     | 0.215    | 0.303    | 0.09     | 0.774    | 0.861    |
| KIF5B_CpG_18               | 0.18     | 0.680    | 0.736    | 0.06     | 0.815    | 0.886    |
| KIF5B_CpG_19.20.21         | 9.52     | 0.009    | 0.021    | 3.43     | 0.089    | 0.178    |
| KIF5B_CpG_22.23.24.25.26   | 3.80     | 0.075    | 0.126    | 5.37     | 0.039    | 0.094    |
| KIF5B_CpG_31.32            | 0.01     | 0.923    | 0.946    | 0.13     | 0.727    | 0.825    |
| KIF5B_CpG_33               | 9.84     | 0.009    | 0.021    | 0.29     | 0.600    | 0.727    |
| MAP1LC3A_1_CpG_1           | 589.68   | 1.43E-11 | 1.58E-10 | 299.61   | 7.48E-10 | 7.36E-09 |
| MAP1LC3A_1_CpG_2.3         | 935.05   | 5.42E-12 | 6.31E-11 | 637.03   | 4.35E-11 | 5.13E-10 |
| MAP1LC3A_1_CpG_4           | 1037.14  | 5.08E-13 | 7.67E-12 | 2057.28  | 8.60E-15 | 2.22E-13 |
| MAP1LC3A_1_CpG_5           | 7.69     | 0.017    | 0.034    | 4.96     | 0.046    | 0.107    |
| MAP1LC3A_1_CpG_6.7         | 9956.83  | 6.87E-19 | 1.22E-16 | 3781.92  | 2.26E-16 | 7.78E-15 |
| MAP1LC3A_1_CpG_8.9         | 476.32   | 2.05E-08 | 1.39E-07 | 413.39   | 3.58E-08 | 3.02E-07 |
| MAP1LC3A_1_CpG_10          | 229.27   | 3.49E-09 | 2.64E-08 | 161.19   | 2.57E-08 | 2.26E-07 |
| MAP1LC3A_1_CpG_11.12       | 466.50   | 2.22E-08 | 1.46E-07 | 413.39   | 3.58E-08 | 3.02E-07 |
| MAP1LC3A_1_CpG_13.14       | 1538.88  | 4.86E-14 | 1.17E-12 | 1595.59  | 3.92E-14 | 7.35E-13 |
| MAP1LC3A_1_CpG_15          | 1068.83  | 4.25E-13 | 6.93E-12 | 557.20   | 2.00E-11 | 2.58E-10 |
| MAP1LC3A_1_CpG_16          | 597.67   | 1.32E-11 | 1.50E-10 | 299.61   | 7.48E-10 | 7.36E-09 |
| MAP1LC3A_1_CpG_17.18       | 9517.70  | 9.00E-19 | 1.22E-16 | 13969.34 | 9.02E-20 | 1.24E-17 |
| MAP1LC3A_1_CpG_19.20.21    | 20038.93 | 2.74E-19 | 1.12E-16 | 6642.27  | 1.18E-16 | 4.88E-15 |
| MAP1LC3A_1_CpG_22.23.24.25 | 6117.03  | 1.27E-17 | 1.30E-15 | 5655.36  | 2.03E-17 | 1.40E-15 |
| MAP1LC3A_1_CpG_26          | 5187.82  | 3.41E-17 | 2.32E-15 | 4908.83  | 4.75E-17 | 2.45E-15 |
| MAP1LC3A_1_CpG_27.28       | 1564.59  | 4.40E-14 | 1.12E-12 | 1595.59  | 3.92E-14 | 7.35E-13 |
| MAP1LC3A_1_CpG_29          | 2004.03  | 1.01E-14 | 3.42E-13 | 1276.91  | 1.48E-13 | 2.44E-12 |
| MAP1LC3A_1_CpG_30          | 1818.76  | 1.79E-14 | 5.63E-13 | 1875.64  | 1.49E-14 | 3.36E-13 |
| MAP1LC3A_1_CpG_32          | 489.68   | 4.27E-11 | 3.87E-10 | 336.34   | 3.83E-10 | 4.16E-09 |
| MAP1LC3A_1_CpG_33.34       | 3459.77  | 3.85E-16 | 1.96E-14 | 3459.66  | 3.85E-16 | 1.16E-14 |
| MAP1LC3A_1_CpG_35          | 171.51   | 1.82E-08 | 1.26E-07 | 109.14   | 2.23E-07 | 1.74E-06 |
| MAP1LC3A_1_CpG_36          | 1663.34  | 3.06E-14 | 8.31E-13 | 1506.88  | 5.50E-14 | 9.88E-13 |
| MAP1LC3A_1_CpG_37          | 576.83   | 1.63E-11 | 1.75E-10 | 299.61   | 7.48E-10 | 7.36E-09 |
| MAP1LC3A_1_CpG_38          | 1096.01  | 3.66E-13 | 6.22E-12 | 557.20   | 2.00E-11 | 2.58E-10 |
| MAP1LC3A_1_CpG_39          | 574.08   | 1.68E-11 | 1.75E-10 | 299.61   | 7.48E-10 | 7.36E-09 |
| MAP1LC3A_1_CpG_40          | 4557.14  | 7.41E-17 | 4.32E-15 | 532.34   | 2.61E-11 | 3.18E-10 |
| MAP1LC3A_1_CpG_44.45       | 33.82    | 8.27E-05 | 3.01E-04 | 27.03    | 2.22E-04 | 0.001    |
| MAP1LC3A_2_CpG_6.7         | 5.48     | 0.037    | 0.070    | 4.42     | 0.057    | 0.130    |
| MAP1LC3A_2_CpG_8.9         | 29.96    | 1.42E-04 | 4.95E-04 | 24.83    | 3.18E-04 | 0.001    |
| MAP1LC3A_2_CpG_10          | 29.24    | 1.58E-04 | 5.47E-04 | 7.72     | 0.017    | 0.046    |
| MAP1LC3A_2_CpG_11.12.13    | 48.68    | 1.48E-05 | 6.36E-05 | 37.88    | 4.91E-05 | 2.82E-04 |
| MAP1LC3A_2_CpG_15          | 1.79     | 0.206    | 0.293    | 1.78     | 0.207    | 0.344    |
| MAP1LC3A_2_CpG_16.17       | 7.76     | 0.016    | 0.034    | 0.22     | 0.647    | 0.761    |
| MAP1LC3A_2_CpG_18          | 17.84    | 0.001    | 0.003    | 0.12     | 0.740    | 0.834    |
| MAP1LC3A_2_CpG_19          | 0.28     | 0.607    | 0.667    | 0.46     | 0.511    | 0.657    |
| MAP1LC3A_2_CpG_30          | 100.76   | 5.54E-04 | 0.002    | 0.01     | 0.945    | 0.957    |
| MAP1LC3A_2_CpG_31          | 12.96    | 0.009    | 0.020    | 6.61     | 0.037    | 0.090    |
| MAP1LC3B_CpG_1             | 1982.79  | 8.95E-14 | 1.66E-12 | 699.80   | 2.61E-11 | 3.18E-10 |
| MAP1LC3B_CpG_3             | 2.38     | 0.157    | 0.238    | 1.91     | 0.200    | 0.340    |

|                             |         |          |          |         |          |          |
|-----------------------------|---------|----------|----------|---------|----------|----------|
| MAP1LC3B_CpG_4.5.6          | 883.76  | 1.31E-12 | 1.91E-11 | 2.71    | 0.126    | 0.242    |
| MAP1LC3B_CpG_7              | 183.86  | 3.28E-08 | 2.06E-07 | 47.42   | 2.63E-05 | 1.65E-04 |
| MAP1LC3B_CpG_8              | 145.01  | 4.65E-08 | 2.88E-07 | 10.20   | 0.008    | 0.023    |
| MAP1LC3B_CpG_9              | 851.33  | 1.64E-12 | 2.23E-11 | 246.74  | 2.29E-09 | 2.10E-08 |
| MAP1LC3B_CpG_10.11          | 813.89  | 2.14E-12 | 2.81E-11 | 256.02  | 1.85E-09 | 1.74E-08 |
| MAP1LC3B_CpG_12.13          | 5263.37 | 3.13E-17 | 2.32E-15 | 1014.80 | 5.78E-13 | 9.18E-12 |
| MAP1LC3B_CpG_14.15.16       | 2490.67 | 2.75E-15 | 1.25E-13 | 1936.33 | 1.23E-14 | 3.00E-13 |
| MAP1LC3B_CpG_18             | 183.86  | 3.28E-08 | 2.06E-07 | 35.96   | 8.97E-05 | 4.63E-04 |
| MAP1LC3B_CpG_20.21.22       | 16.60   | 0.002    | 0.006    | 0.10    | 0.755    | 0.846    |
| MAP1LC3B_CpG_24.25          | 113.00  | 1.84E-07 | 1.04E-06 | 5.55    | 0.036    | 0.089    |
| MAP1LC3B_CpG_26.27          | 113.00  | 1.84E-07 | 1.04E-06 | 7.36    | 0.019    | 0.051    |
| MAP1LC3B_CpG_28             | 44.97   | 8.80E-05 | 3.18E-04 | 32.81   | 2.84E-04 | 0.001    |
| MARCH5_1_CpG_1              | 20.74   | 6.62E-04 | 0.002    | 0.52    | 0.486    | 0.645    |
| MARCH5_1_CpG_2.3.4          | 0.35    | 0.563    | 0.628    | 0.86    | 0.373    | 0.530    |
| MARCH5_1_CpG_5              | 0.43    | 0.523    | 0.590    | 0.31    | 0.590    | 0.722    |
| MARCH5_1_CpG_6.7            | 1.59    | 0.231    | 0.318    | 0.29    | 0.599    | 0.727    |
| MARCH5_1_CpG_9.10.11        | 12.20   | 0.004    | 0.011    | 2.52    | 0.138    | 0.262    |
| MARCH5_1_CpG_12             | 5.71    | 0.062    | 0.106    | 0.54    | 0.502    | 0.652    |
| MARCH5_2_CpG_1.2            | 2.27    | 0.175    | 0.254    | 1.46    | 0.266    | 0.423    |
| MARCH5_2_CpG_6.7            | 10.72   | 0.007    | 0.016    | 1.16    | 0.303    | 0.464    |
| MARCH5_2_CpG_9.10           | 2.16    | 0.172    | 0.250    | 2.16    | 0.172    | 0.307    |
| MARCH5_2_CpG_11.12          | 0.01    | 0.913    | 0.939    | 0.07    | 0.797    | 0.875    |
| MARCH5_2_CpG_13.14.15.16    | 9.20    | 0.010    | 0.023    | 0.10    | 0.756    | 0.846    |
| MARCH5_2_CpG_17             | 1.20    | 0.299    | 0.392    | 1.38    | 0.270    | 0.426    |
| MARCH5_2_CpG_18.19          | 21.91   | 5.32E-04 | 0.002    | 0.70    | 0.420    | 0.584    |
| MARCH5_2_CpG_22.23.24       | 0.03    | 0.864    | 0.897    | 1.36    | 0.267    | 0.424    |
| MARCH5_2_CpG_25.26.27       | 4.34    | 0.059    | 0.102    | 0.65    | 0.437    | 0.601    |
| MARCH5_2_CpG_33             | 0.76    | 0.402    | 0.480    | 18.31   | 0.001    | 0.004    |
| MARCH5_2_CpG_34.35.36       | 2.22    | 0.162    | 0.240    | 1.31    | 0.274    | 0.429    |
| MARCH5_2_CpG_38             | 9.13    | 0.011    | 0.023    | 2.27    | 0.158    | 0.287    |
| MARCH5_2_CpG_39.40.41.42.43 | 0.21    | 0.658    | 0.718    | 1.06    | 0.323    | 0.484    |
| MARCH5_2_CpG_44             | 37.61   | 5.08E-05 | 1.97E-04 | 49.30   | 1.39E-05 | 9.42E-05 |
| MARCH5_2_CpG_45.46          | 2.75    | 0.123    | 0.192    | 0.19    | 0.667    | 0.781    |
| MARCH5_3_CpG v_1            | 36.01   | 6.21E-05 | 2.37E-04 | 17.80   | 0.001    | 0.005    |
| MARCH5_3_CpG_7              | 26.21   | 2.53E-04 | 8.55E-04 | 3.11    | 0.103    | 0.203    |
| MFN1_CpG_1.2                | 0.36    | 0.557    | 0.623    | 0.21    | 0.653    | 0.766    |
| MFN1_CpG_6                  | 9.84    | 0.014    | 0.029    | 10.15   | 0.032    | 0.047    |
| MFN1_CpG_9.10               | 38.11   | 4.77E-05 | 1.89E-04 | 6.48    | 0.027    | 0.070    |
| MFN1_CpG_11                 | 68.58   | 4.19E-04 | 0.001    | 525.00  | 2.94E-06 | 2.13E-05 |
| MFN1_CpG_17.18              | 3.44    | 0.088    | 0.146    | 0.47    | 0.507    | 0.655    |
| MFN1_CpG_3.4.5              | 10.49   | 0.007    | 0.017    | 0.51    | 0.489    | 0.647    |
| MFN2_CpG_1                  | 1.15    | 0.332    | 0.413    | 0.09    | 0.782    | 0.864    |
| MFN2_CpG_5.6.7.8            | 13.35   | 0.003    | 0.009    | 3.45    | 0.088    | 0.178    |
| MFN2_CpG_9.10.11            | 1.10    | 0.316    | 0.406    | 0.43    | 0.527    | 0.671    |
| MFN2_CpG_12.13              | 23.79   | 3.80E-04 | 0.001    | 1.35    | 0.268    | 0.425    |
| MFN2_CpG_14.15.16           | 2.19    | 0.21     | 0.384    | 2.06    | 0.189    | 0.326    |

|                           |         |          |          |        |          |          |
|---------------------------|---------|----------|----------|--------|----------|----------|
| MFN2_CpG_17.18            | 6.74    | 0.023    | 0.045    | 0.67   | 0.429    | 0.592    |
| MFN2_CpG_19.20            | 0.37    | 0.552    | 0.619    | 0.02   | 0.878    | 0.920    |
| MFN2_CpG_21               | 1.72    | 0.222    | 0.310    | 0.50   | 0.504    | 0.653    |
| MFN2_CpG_22.23            | 2.35    | 0.164    | 0.241    | 0.37   | 0.562    | 0.706    |
| MFN2_CpG_24               | 13.17   | 0.003    | 0.009    | 8.80   | 0.012    | 0.034    |
| MTERF1_CpG_1.2            | 113.36  | 1.81E-07 | 1.04E-06 | 12.25  | 0.004    | 0.014    |
| MTERF1_CpG_3.4            | 12.60   | 0.004    | 0.010    | 2.45   | 0.143    | 0.269    |
| MTERF1_CpG_5              | 2.71    | 0.126    | 0.196    | 0.13   | 0.721    | 0.822    |
| MTERF1_CpG_6              | 763.23  | 3.12E-12 | 3.98E-11 | 9.02   | 0.011    | 0.032    |
| MTERF1_CpG_7              | 1271.71 | 1.51E-13 | 2.68E-12 | 1.96   | 0.187    | 0.324    |
| MTERFD1_1_CpG_1.2         | 34.27   | 7.79E-05 | 2.92E-04 | 16.22  | 0.002    | 0.006    |
| MTERFD1_1_CpG_3.4.5.6     | 2.41    | 0.147    | 0.223    | 4.30   | 0.060    | 0.134    |
| MTERFD1_1_CpG_7           | 31.57   | 1.13E-04 | 4.00E-04 | 30.19  | 1.37E-04 | 6.93E-04 |
| MTERFD1_1_CpG_8.9         | 0.65    | 0.441    | 0.516    | 0.04   | 0.841    | 0.902    |
| MTERFD1_1_CpG_10          | 7.38    | 0.019    | 0.038    | 14.43  | 0.003    | 0.009    |
| MTERFD1_1_CpG_11          | 0.63    | 0.444    | 0.518    | 4.67   | 0.052    | 0.119    |
| MTERFD1_1_CpG_12          | 25.26   | 2.96E-04 | 9.75E-04 | 41.24  | 3.30E-05 | 2.03E-04 |
| MTERFD1_1_CpG_13          | 1.05    | 0.325    | 0.408    | 0.02   | 0.901    | 0.935    |
| MTERFD1_1_CpG_14          | 19.92   | 7.75E-04 | 0.002    | 58.59  | 5.89E-06 | 4.12E-05 |
| MTERFD1_1_CpG_16.17       | 54.68   | 8.33E-06 | 3.78E-05 | 85.94  | 8.07E-07 | 6.06E-06 |
| MTERFD1_1_CpG_24.25       | 4.60    | 0.053    | 0.095    | 0.04   | 0.847    | 0.903    |
| MTERFD1_1_CpG_26          | 24.51   | 3.36E-04 | 0.001    | 115.79 | 1.61E-07 | 1.28E-06 |
| MTERFD1_1_CpG_27          | 1.16    | 0.317    | 0.406    | 1.12   | 0.325    | 0.485    |
| MTERFD1_1_CpG_28.29.30    | 4.21    | 0.063    | 0.106    | 0.03   | 0.867    | 0.916    |
| MTERFD1_1_CpG_31.32.33.34 | 5.87    | 0.032    | 0.061    | 19.91  | 7.77E-04 | 0.003    |
| MTERFD1_1_CpG_35          | 1.05    | 0.325    | 0.408    | 0.11   | 0.741    | 0.834    |
| MTERFD1_1_CpG_36          | 36.68   | 5.70E-05 | 2.20E-04 | 43.50  | 2.55E-05 | 1.62E-04 |
| MTERFD1_1_CpG_37.38       | 1.96    | 0.187    | 0.268    | 0.49   | 0.499    | 0.652    |
| MTERFD1_1_CpG_39          | 0.00    | 0.960    | 0.974    | 0.15   | 0.707    | 0.813    |
| MTERFD1_1_CpG_40          | 1.29    | 0.278    | 0.369    | 4.87   | 0.047    | 0.110    |
| MTERFD1_1_CpG_41          | 182.43  | 1.28E-08 | 9.17E-08 | 277.15 | 1.17E-09 | 1.13E-08 |
| MTERFD1_1_CpG_42.43       | 1.78    | 0.209    | 0.296    | 3.67   | 0.082    | 0.170    |
| MTERFD1_1_CpG_44          | 9.83    | 0.009    | 0.020    | 0.01   | 0.916    | 0.939    |
| MTIF2_CpG_1               | 0.44    | 0.519    | 0.589    | 0.15   | 0.707    | 0.813    |
| MTIF2_CpG_3.4             | 0.56    | 0.467    | 0.540    | 25.54  | 2.83E-04 | 0.001    |
| MTIF2_CpG_5               | 0.05    | 0.824    | 0.862    | 0.46   | 0.523    | 0.671    |
| MTIF2_CpG_7               | 1.26    | 0.299    | 0.392    | 1.96   | 0.204    | 0.343    |
| MTIF2_CpG_8               | 2.63    | 0.131    | 0.201    | 3.32   | 0.093    | 0.186    |
| MTIF2_CpG_9.10            | 2.48    | 0.141    | 0.216    | 0.97   | 0.345    | 0.507    |
| MTIF2_CpG_11              | 139.76  | 5.71E-08 | 3.48E-07 | 21.88  | 5.34E-04 | 0.002    |
| MTIF2_CpG_12              | 0.57    | 0.465    | 0.539    | 0.33   | 0.574    | 0.714    |
| MTIF2_CpG_13.14           | 8.10    | 0.015    | 0.031    | 0.04   | 0.847    | 0.903    |
| MTIF2_CpG_20              | 1.05    | 0.325    | 0.408    | 0.40   | 0.537    | 0.680    |
| MTIF2_CpG_28              | 14.89   | 0.002    | 0.006    | 9.55   | 0.009    | 0.028    |
| MTIF3_1_CpG_1             | 9.74    | 0.009    | 0.020    | 0.87   | 0.369    | 0.530    |
| MTIF3_1_CpG_2             | 21.10   | 6.18E-04 | 0.002    | 25.00  | 3.09E-04 | 0.001    |

|                         |       |          |          |        |          |          |
|-------------------------|-------|----------|----------|--------|----------|----------|
| MTIF3_1_CpG_3           | 12.04 | 0.005    | 0.011    | 1.80   | 0.204    | 0.343    |
| MTIF3_1_CpG_4           | 21.09 | 6.19E-04 | 0.002    | 48.00  | 1.59E-05 | 1.06E-04 |
| MTIF3_1_CpG_5.6.7       | 14.73 | 0.002    | 0.006    | 25.29  | 2.95E-04 | 0.001    |
| MTIF3_1_CpG_8           | 0.61  | 0.451    | 0.524    | 2.60   | 0.133    | 0.253    |
| MTIF3_1_CpG_9           | 1.09  | 0.317    | 0.406    | 0.01   | 0.908    | 0.936    |
| MTIF3_1_CpG_10.11       | 21.80 | 5.42E-04 | 0.002    | 5.42   | 0.038    | 0.092    |
| MTIF3_1_CpG_12          | 9.74  | 0.009    | 0.020    | 1.03   | 0.330    | 0.488    |
| MTIF3_1_CpG_13          | 1.09  | 0.317    | 0.406    | 0.49   | 0.496    | 0.652    |
| MTIF3_1_CpG_17.18.19.20 | 80.63 | 1.13E-06 | 5.77E-06 | 150.86 | 3.73E-08 | 3.08E-07 |
| MTIF3_1_CpG_22.23       | 7.94  | 0.016    | 0.032    | 8.57   | 0.013    | 0.036    |
| MTIF3_1_CpG_24          | 20.09 | 7.49E-04 | 0.002    | 23.25  | 4.17E-04 | 0.002    |
| MTIF3_3_CpG_1.2         | 17.12 | 0.001    | 0.004    | 0.03   | 0.860    | 0.911    |
| MTIF3_3_CpG_3           | 3.63  | 0.081    | 0.134    | 4.21   | 0.065    | 0.143    |
| MTIF3_3_CpG_4.5         | 1.13  | 0.309    | 0.400    | 2.05   | 0.180    | 0.313    |
| MTIF3_3_CpG_6.7         | 12.50 | 0.004    | 0.010    | 1.28   | 0.280    | 0.437    |
| MTIF3_3_CpG_8           | 2.22  | 0.162    | 0.240    | 3.64   | 0.080    | 0.169    |
| MTIF3_3_CpG_9           | 1.02  | 0.331    | 0.413    | 0.86   | 0.371    | 0.530    |
| MTIF3_3_CpG_10          | 1.02  | 0.335    | 0.415    | 3.73   | 0.082    | 0.170    |
| MTIF3_3_CpG_11          | 35.20 | 6.89E-05 | 2.60E-04 | 0.60   | 0.452    | 0.619    |
| MTIF3_3_CpG_12          | 4.33  | 0.060    | 0.102    | 0.31   | 0.588    | 0.720    |
| MTIF3_3_CpG_13          | 61.57 | 4.58E-06 | 2.22E-05 | 5.09   | 0.044    | 0.103    |
| MTIF3_3_CpG_14          | 0.13  | 0.725    | 0.772    | 0.87   | 0.372    | 0.530    |
| MTIF3_3_CpG_15.16       | 11.64 | 0.005    | 0.013    | 19.95  | 7.71E-04 | 0.003    |
| MTIF3_3_CpG_17          | 10.46 | 0.007    | 0.017    | 3.00   | 0.109    | 0.213    |
| POLG_1_CpG_1            | 1.17  | 0.301    | 0.392    | 0.00   | 0.977    | 0.981    |
| POLG_1_CpG_2            | 0.00  | 0.946    | 0.963    | 0.01   | 0.930    | 0.944    |
| POLG_1_CpG_10           | 4.43  | 0.057    | 0.100    | 1.12   | 0.310    | 0.471    |
| POLG_1_CpG_11.12.13     | 0.48  | 0.501    | 0.574    | 0.00   | 0.952    | 0.961    |
| POLG_1_CpG_14.15.16     | 0.05  | 0.828    | 0.862    | 1.64   | 0.224    | 0.367    |
| POLG_1_CpG_17           | 0.44  | 0.522    | 0.590    | 0.01   | 0.926    | 0.944    |
| POLG_1_CpG_18           | 0.43  | 0.523    | 0.590    | 0.02   | 0.904    | 0.936    |
| POLG_1_CpG_19           | 5.73  | 0.034    | 0.064    | 2.29   | 0.156    | 0.287    |
| POLG_1_CpG_20           | 0.63  | 0.442    | 0.516    | 1.09   | 0.316    | 0.479    |
| POLG_1_CpG_21.22        | 2.67  | 0.128    | 0.199    | 0.06   | 0.819    | 0.886    |
| POLG_1_CpG_23           | 3.39  | 0.090    | 0.147    | 1.21   | 0.292    | 0.454    |
| POLG_1_CpG_3            | 4.55  | 0.054    | 0.096    | 3.66   | 0.080    | 0.169    |
| POLG_1_CpG_4            | 1.97  | 0.186    | 0.267    | 1.81   | 0.203    | 0.343    |
| POLG_1_CpG_5            | 0.20  | 0.663    | 0.721    | 10.31  | 0.007    | 0.023    |
| POLG_1_CpG_6.7          | 0.05  | 0.828    | 0.862    | 0.52   | 0.483    | 0.645    |
| POLG_1_CpG_8            | 1.48  | 0.248    | 0.337    | 2.08   | 0.175    | 0.308    |
| POLG_1_CpG_9            | 1.47  | 0.249    | 0.338    | 13.26  | 0.003    | 0.012    |
| POLG_2_CpG_1.2.3.4      | 11.77 | 0.005    | 0.012    | 40.84  | 3.45E-05 | 2.10E-04 |
| POLG_2_CpG_6.7.8.9      | 9.31  | 0.010    | 0.022    | 19.93  | 7.73E-04 | 0.003    |
| POLG_2_CpG_10.11        | 0.03  | 0.876    | 0.907    | 6.83   | 0.023    | 0.060    |
| POLG_2_CpG_12           | 0.01  | 0.940    | 0.959    | 7.72   | 0.017    | 0.046    |
| POLG_2_CpG_16           | 1.77  | 0.208    | 0.295    | 1.20   | 0.295    | 0.457    |

|                         |         |          |          |        |          |          |
|-------------------------|---------|----------|----------|--------|----------|----------|
| POLG_2_CpG_23           | 8.15    | 0.015    | 0.031    | 0.24   | 0.635    | 0.751    |
| POLG_2_CpG_24           | 12.32   | 0.004    | 0.011    | 21.19  | 6.07E-04 | 0.003    |
| POLG_2_CpG_29           | 2.25    | 0.160    | 0.240    | 5.05   | 0.044    | 0.104    |
| POLG_2_CpG_30           | 6.65    | 0.024    | 0.047    | 9.09   | 0.011    | 0.032    |
| POLG_2_CpG_31.32        | 62.71   | 4.17E-06 | 2.08E-05 | 16.99  | 0.001    | 0.005    |
| POLG_2_CpG_33           | 20.96   | 7.92E-04 | 0.002    | 20.13  | 0.001    | 0.005    |
| POLG_2_CpG_34           | 0.00    | 0.989    | 0.992    | 0.56   | 0.471    | 0.635    |
| POLG_2_CpG_35.36        | 16.02   | 0.001    | 0.009    | 17.55  | 0.004    | 0.014    |
| POLG_2_CpG_37           | 51.12   | 1.16E-05 | 5.17E-05 | 37.93  | 4.88E-05 | 2.82E-04 |
| POLG_2_CpG_38.39.40.41  | 26.11   | 2.57E-04 | 8.61E-04 | 13.26  | 0.003    | 0.012    |
| POLG_2_CpG_43.44.45     | 4.41    | 0.057    | 0.100    | 16.09  | 0.002    | 0.006    |
| POLG2_CpG_1             | 10.02   | 0.008    | 0.019    | 0.70   | 0.418    | 0.584    |
| POLG2_CpG_3             | 1.46    | 0.258    | 0.345    | 4.25   | 0.069    | 0.150    |
| POLG2_CpG_4             | 8.52    | 0.013    | 0.027    | 7.80   | 0.016    | 0.045    |
| POLG2_CpG_6             | 2.05    | 0.178    | 0.256    | 2.77   | 0.122    | 0.235    |
| POLG2_CpG_7             | 10.02   | 0.008    | 0.019    | 1.19   | 0.296    | 0.457    |
| POLG2_CpG_8.9           | 0.01    | 0.908    | 0.936    | 0.33   | 0.578    | 0.715    |
| POLG2_CpG_10            | 6.32    | 0.029    | 0.055    | 0.31   | 0.587    | 0.720    |
| POLG2_CpG_12.13.14      | 19.50   | 8.42E-04 | 0.002    | 20.40  | 7.06E-04 | 0.003    |
| POLG2_CpG_15            | 9.58    | 0.009    | 0.021    | 0.00   | 0.981    | 0.984    |
| POLG2_CpG_16            | 1.46    | 0.258    | 0.345    | 4.82   | 0.056    | 0.128    |
| POLG2_CpG_17.18.19      | 2.97    | 0.110    | 0.175    | 2.10   | 0.173    | 0.308    |
| POLG2_CpG_20.21         | 20.49   | 6.94E-04 | 0.002    | 90.56  | 6.10E-07 | 4.67E-06 |
| POLG2_CpG_22            | 7.75    | 0.017    | 0.034    | 12.82  | 0.004    | 0.013    |
| POLG2_CpG_23.24.25      | 2.56    | 0.135    | 0.208    | 0.03   | 0.870    | 0.917    |
| POLRMT_2_CpG_5          | 0.05    | 0.825    | 0.862    | 0.28   | 0.608    | 0.728    |
| POLRMT_2_CpG_10         | 131.61  | 7.97E-08 | 4.71E-07 | 131.61 | 7.97E-08 | 6.45E-07 |
| RAB32_1_CpG_4.5.6       | 0.58    | 0.568    | 0.723    | 0.49   | 0.502    | 0.652    |
| RAB32_1_CpG_7.8         | 186.26  | 3.07E-08 | 1.99E-07 | 0.16   | 0.700    | 0.812    |
| RAB32_1_CpG_9           | 639.64  | 1.14E-09 | 9.09E-09 | 3.76   | 0.084    | 0.174    |
| RAB32_1_CpG_10          | 326.29  | 2.22E-08 | 1.46E-07 | 2.38   | 0.157    | 0.287    |
| RAB32_1_CpG_11.12.13    | 0.97    | 0.401    | 0.667    | 0.86   | 0.372    | 0.530    |
| RAB32_1_CpG_14.15       | 59.90   | 5.27E-06 | 2.44E-05 | 0.25   | 0.628    | 0.747    |
| RAB32_1_CpG_24          | 110.49  | 2.08E-07 | 1.15E-06 | 2.32   | 0.154    | 0.285    |
| RAB32_1_CpG_25.26       | 52.20   | 1.05E-05 | 4.71E-05 | 0.70   | 0.420    | 0.584    |
| RAB32_1_CpG_27.28.29.30 | 512.12  | 3.28E-11 | 3.11E-10 | 1.67   | 0.220    | 0.362    |
| RAB32_1_CpG_31.32       | 188.14  | 1.08E-08 | 7.84E-08 | 6.54   | 0.025    | 0.066    |
| RAB32_1_CpG_40.41       | 10.19   | 0.019    | 0.038    | 0.06   | 0.819    | 0.886    |
| RAB32_1_CpG_42          | 231.61  | 3.29E-09 | 2.53E-08 | 0.39   | 0.542    | 0.684    |
| RAB32_1_CpG_43          | 91.74   | 5.12E-06 | 2.40E-05 | 10.08  | 0.011    | 0.033    |
| RAB32_1_CpG_45.46.47    | 418.35  | 4.20E-10 | 3.43E-09 | 32.53  | 1.38E-04 | 6.93E-04 |
| RAB32_1_CpG_48          | 91.74   | 5.12E-06 | 2.40E-05 | 12.24  | 0.007    | 0.021    |
| RAB32_1_CpG_49          | 245.64  | 2.35E-09 | 1.84E-08 | 18.29  | 0.001    | 0.004    |
| RAB32_1_CpG_50.51       | 551.45  | 2.12E-11 | 2.11E-10 | 34.34  | 7.72E-05 | 4.14E-04 |
| RAB32_1_CpG_52          | 192.18  | 9.54E-09 | 7.08E-08 | 0.88   | 0.368    | 0.530    |
| RAB32_1_CpG_57.58       | 1045.10 | 4.85E-13 | 7.61E-12 | 6.80   | 0.023    | 0.060    |

|                         |         |          |          |         |          |          |
|-------------------------|---------|----------|----------|---------|----------|----------|
| RAB32_1_CpG_59.60       | 33.84   | 8.25E-05 | 3.01E-04 | 1.43    | 0.255    | 0.408    |
| RAB32_2_CpG_1.2         | 85.67   | 8.20E-07 | 4.24E-06 | 68.11   | 2.73E-06 | 2.01E-05 |
| RAB32_2_CpG_3           | 2787.76 | 1.58E-12 | 2.22E-11 | 1611.62 | 1.84E-11 | 2.53E-10 |
| RAB32_2_CpG_4           | 25.94   | 6.52E-04 | 0.002    | 22.14   | 0.001    | 0.004    |
| RAB32_2_CpG_7           | 818.43  | 1.64E-08 | 1.15E-07 | 781.23  | 1.93E-08 | 1.73E-07 |
| RAB32_2_CpG_8           | 3860.55 | 7.35E-11 | 6.52E-10 | 2801.42 | 2.25E-10 | 2.51E-09 |
| RAB32_2_CpG_10.11       | 3881.90 | 2.76E-14 | 8.04E-13 | 2046.12 | 6.71E-13 | 1.03E-11 |
| RAB32_2_CpG_12.13.14.15 | 3781.77 | 7.89E-11 | 6.85E-10 | 3339.41 | 1.22E-10 | 1.40E-09 |
| RAB32_2_CpG_19          | 2396.90 | 3.45E-15 | 1.41E-13 | 1864.86 | 1.55E-14 | 3.36E-13 |
| RHOT1_CpG_1.2.3.4       | 2.22    | 0.162    | 0.240    | 0.55    | 0.473    | 0.636    |
| RHOT1_CpG_5.6           | 6.07    | 0.030    | 0.057    | 0.24    | 0.634    | 0.751    |
| RHOT1_CpG_7.8           | 0.15    | 0.710    | 0.764    | 1.51    | 0.242    | 0.394    |
| RHOT1_CpG_9.10          | 4.54    | 0.055    | 0.096    | 7.12    | 0.020    | 0.055    |
| RHOT1_CpG_11            | 0.08    | 0.787    | 0.827    | 2.14    | 0.174    | 0.308    |
| RHOT1_CpG_12            | 7.01    | 0.021    | 0.042    | 0.78    | 0.395    | 0.558    |
| RHOT1_CpG_13            | 31.75   | 1.10E-04 | 3.94E-04 | 2.41    | 0.147    | 0.274    |
| TFAM_CpG_2              | 4.92    | 0.047    | 0.085    | 0.00    | 1.000    | 1.000    |
| TFAM_CpG_3.4            | 1.63    | 0.226    | 0.313    | 1.47    | 0.249    | 0.401    |
| TFAM_CpG_5              | 4.60    | 0.053    | 0.095    | 7.32    | 0.019    | 0.051    |
| TFAM_CpG_6.7            | 60.96   | 4.82E-06 | 2.31E-05 | 15.93   | 0.002    | 0.007    |
| TFAM_CpG_8.9.10.11      | 4.54    | 0.055    | 0.096    | 3.67    | 0.079    | 0.169    |
| TFAM_CpG_12             | 105.45  | 2.69E-07 | 1.46E-06 | 61.22   | 4.71E-06 | 3.36E-05 |
| TFAM_CpG_13.14.15       | 22.69   | 4.61E-04 | 0.001    | 3.92    | 0.071    | 0.152    |
| TFB1M_CpG_1             | 16.97   | 0.001    | 0.004    | 5.04    | 0.044    | 0.104    |
| TFB1M_CpG_2             | 0.45    | 0.513    | 0.586    | 35.02   | 7.05E-05 | 3.88E-04 |
| TFB1M_CpG_3             | 111.80  | 1.95E-07 | 1.09E-06 | 16.53   | 0.002    | 0.006    |
| TFB1M_CpG_5             | 12.95   | 0.004    | 0.009    | 0.05    | 0.825    | 0.887    |
| TFB1M_CpG_6             | 92.28   | 5.52E-07 | 2.89E-06 | 21.87   | 5.36E-04 | 0.002    |
| TFB1M_CpG_7.8           | 16.51   | 0.002    | 0.004    | 5.73    | 0.034    | 0.084    |
| TFB1M_CpG_9.10.11       | 61.93   | 4.45E-06 | 2.19E-05 | 45.79   | 2.00E-05 | 1.31E-04 |
| TFB1M_CpG_12.13         | 4.41    | 0.058    | 0.100    | 0.88    | 0.366    | 0.530    |
| TFB1M_CpG_14            | 1.71    | 0.216    | 0.303    | 9.24    | 0.010    | 0.030    |
| TFB1M_CpG_15.16         | 19.25   | 8.85E-04 | 0.003    | 0.06    | 0.807    | 0.880    |
| TFB1M_CpG_17            | 5.46    | 0.038    | 0.070    | 0.05    | 0.825    | 0.887    |
| TFB1M_CpG_19.20         | 14.91   | 0.002    | 0.006    | 3.43    | 0.089    | 0.178    |
| TFB1M_CpG_21.22         | 3.08    | 0.105    | 0.169    | 0.02    | 0.893    | 0.929    |
| TFB1M_CpG_23            | 14.69   | 0.002    | 0.006    | 0.02    | 0.883    | 0.924    |
| TFB1M_CpG_24            | 1.71    | 0.216    | 0.303    | 10.21   | 0.008    | 0.023    |
| TFB1M_CpG_25.26         | 55.51   | 7.73E-06 | 3.54E-05 | 11.21   | 0.006    | 0.018    |
| TFB1M_CpG_30            | 0.21    | 0.715    | 0.810    | 0.16    | 0.695    | 0.809    |
| TFB1M_CpG_31            | 8.52    | 0.013    | 0.027    | 0.11    | 0.741    | 0.834    |
| TFB2M_CpG_1             | 44.81   | 2.22E-05 | 9.32E-05 | 36.91   | 5.54E-05 | 3.13E-04 |
| TFB2M_CpG_3             | 4.14    | 0.076    | 0.127    | 2.40    | 0.160    | 0.290    |
| TFB2M_CpG_4.5           | 27.20   | 2.16E-04 | 7.35E-04 | 55.69   | 7.61E-06 | 5.24E-05 |
| TFB2M_CpG_6             | 1.08    | 0.320    | 0.406    | 0.01    | 0.920    | 0.940    |
| TFB2M_CpG_7             | 43.76   | 2.48E-05 | 1.01E-04 | 8.55    | 0.013    | 0.036    |

|                    |       |          |          |       |          |          |
|--------------------|-------|----------|----------|-------|----------|----------|
| TFB2M_CpG_8        | 0.00  | 0.975    | 0.983    | 12.11 | 0.005    | 0.016    |
| TFB2M_CpG_9        | 1.08  | 0.320    | 0.406    | 0.07  | 0.801    | 0.875    |
| TFB2M_CpG_13.14    | 14.21 | 0.003    | 0.007    | 17.64 | 0.001    | 0.005    |
| TFB2M_CpG_15       | 3.42  | 0.089    | 0.146    | 0.48  | 0.501    | 0.652    |
| TFB2M_CpG_18.19    | 22.08 | 5.16E-04 | 0.002    | 4.03  | 0.068    | 0.148    |
| TFB2M_CpG_20       | 1.69  | 0.218    | 0.304    | 6.52  | 0.025    | 0.066    |
| TFB2M_CpG_24       | 3.42  | 0.089    | 0.146    | 0.33  | 0.577    | 0.715    |
| TFB2M_CpG_30       | 0.14  | 0.718    | 0.766    | 6.33  | 0.027    | 0.070    |
| TFB2M_CpG_31.32    | 0.95  | 0.348    | 0.431    | 1.32  | 0.273    | 0.429    |
| TFB2M_CpG_33       | 2.22  | 0.162    | 0.240    | 4.38  | 0.058    | 0.132    |
| TFB2M_CpG_34.35    | 1.38  | 0.263    | 0.350    | 5.11  | 0.043    | 0.103    |
| TFB2M_CpG_36       | 1.08  | 0.320    | 0.406    | 0.07  | 0.801    | 0.875    |
| TFB2M_CpG_37       | 0.00  | 0.975    | 0.983    | 25.65 | 3.64E-04 | 0.002    |
| TFB2M_CpG_38       | 1.43  | 0.256    | 0.344    | 2.29  | 0.156    | 0.287    |
| TFB2M_CpG_39       | 43.76 | 2.48E-05 | 1.01E-04 | 43.76 | 2.48E-05 | 1.60E-04 |
| TFB2M_CpG_40.41.42 | 0.00  | 0.981    | 0.986    | 1.06  | 0.324    | 0.484    |
| TFB2M_CpG_43.44    | 14.21 | 0.003    | 0.007    | 3.61  | 0.082    | 0.170    |
